# Supplementary material
Source: PubMed Central journal article supplement (PMC1622849)
Supplement: pnas_0604104103_1.pdf [file pnas_0604104103_1.pdf]

**A**DGK $\delta$  protein**B**DGK $\delta$  genedeletion  
targeting  
vectorrecombinant  
mutant allele**C**

RT-PCR

**D**

Immunoblot

**E**

RT-PCR

(+/-) (-/-)

**F**DGK $\delta$ 

actin
